# Supplementary material for: Mitochondrial Kv1.3 Channels as Target for Treatment of Multiple Myeloma
Source: MDPI journal article supplement (doi:10.3390/cancers14081955), 2022-04-13
Supplement: s1 [file s1]

**Supplementary Table S1. EC50 values for PAPTP and PCARBTP in patient-derived multiple myeloma cells.** EC50 values for PAPTP and PCARBTP were calculated for each patient derived plasma-cell clone.

| <b>1st diagnosis standard risk cytogenetics</b> |                                       |                                         |
|-------------------------------------------------|---------------------------------------|-----------------------------------------|
| <b>Patient</b>                                  | <b>EC50 [<math>\mu</math>M] PAPTP</b> | <b>EC50 [<math>\mu</math>M] PCARBTP</b> |
| # 15                                            | < 0.001                               | <0.001                                  |
| # 12                                            | 0.03                                  | 1.04                                    |
| # 23                                            | 0.03                                  | 0.06                                    |
| # 19                                            | 0.25                                  | 0.62                                    |
| # 27                                            | 0.28                                  | 0.68                                    |
| # 5                                             | 0.46                                  | 1.16                                    |
| # 26                                            | 0.47                                  | 1.18                                    |
| # 13                                            | 0.53                                  | 1.38                                    |
| # 16                                            | 0.58                                  | 2.27                                    |
| # 7                                             | 0.59                                  | 2.05                                    |
| # 21                                            | 0.64                                  | 1.6                                     |
| # 18                                            | 0.68                                  | 1.7                                     |
| # 24                                            | 2.20                                  | 5.53                                    |
| # 8                                             | Non-responsive                        | Non-responsive                          |
| <b>1st diagnosis high-risk cytogenetics</b>     |                                       |                                         |
| # 4                                             | 0.02                                  | 0.6                                     |
| # 11                                            | 0.03                                  | 1.08                                    |
| # 25                                            | 0.03                                  | 0.06                                    |
| # 1                                             | 0.32                                  | 2.27                                    |
| # 17                                            | 1.30                                  | 4.43                                    |
| # 9                                             | 4.80                                  | Non-responsive                          |
| <b>Relapsed/refractory</b>                      |                                       |                                         |
| # 10                                            | 0.02                                  | 0.15                                    |
| # 14                                            | 0.13                                  | 0.002                                   |
| # 3                                             | 0.55                                  | 1.40                                    |
| # 2                                             | 0.56                                  | 1.40                                    |
| # 20                                            | 0.70                                  | 2.35                                    |
| # 22                                            | 3.13                                  | 7.82                                    |
| # 6                                             | 3.36                                  | 3.50                                    |

**Supplementary Table S2. Up-regulated genes in RPMI8226-R1.0 and L363-R3.5.** In RPMI8226-R1.0 cells 74 genes have been up-regulated > 2 log2-fold (p-value < 0.01) and 7 genes  $\geq$  2-fold (adjusted p-value < 0.01) that have been up-regulated in L363-R3.5 in comparison to the respective parental cell line. Only one gene ABCB1 (MDR-1; highlighted in orange) is up-regulated in both RPMI8226-R1.0 and L363-R3.5 cells.

| RPMI8226        |                  |                |            | L363            |                  |                |         |
|-----------------|------------------|----------------|------------|-----------------|------------------|----------------|---------|
| ID              | log2-fold change | p-value (adj.) | Gene       | ID              | log2-fold change | p-value (adj.) | Gene    |
| ENSG00000180777 | 5,19             | 1,3952E-42     | ANKRD30B   | ENSG00000085563 | 5,12             | 2,06E-55       | ABCB1   |
| ENSG00000145242 | 4,76             | 2,5409E-28     | EPHA5      | ENSG00000176049 | 2,79             | 2,27E-14       | JAKMIP2 |
| ENSG00000147655 | 4,73             | 5,5233E-24     | RSPO2      | ENSG00000169550 | 2,72             | 1,40E-14       | MUC15   |
| ENSG00000154975 | 4,36             | 1,4681E-19     | CA10       | ENSG00000107201 | 2,62             | 1,62E-12       | DDX58   |
| ENSG00000180828 | 4,35             | 1,5426E-19     | BHLHE22    | ENSG00000173068 | 2,57             | 6,26E-11       | BNC2    |
| ENSG00000169439 | 4,26             | 1,801E-67      | SDC2       | ENSG00000170775 | 2,13             | 3,61E-09       | GPR37   |
| ENSG00000165995 | 4,19             | 7,6445E-19     | CACNB2     | ENSG00000112320 | 2,09             | 1,12E-07       | SOBP    |
| ENSG00000085563 | 4,01             | 1,7459E-21     | ABCB1      |                 |                  |                |         |
| ENSG00000183206 | 3,80             | 4,0518E-14     | POTEC      |                 |                  |                |         |
| ENSG00000008517 | 3,74             | 2,8474E-89     | IL32       |                 |                  |                |         |
| ENSG00000114861 | 3,58             | 5,9767E-34     | FOXP1      |                 |                  |                |         |
| ENSG00000173114 | 3,48             | 4,9711E-13     | LRRN3      |                 |                  |                |         |
| ENSG00000137766 | 3,44             | 1,8174E-82     | UNC13C     |                 |                  |                |         |
| ENSG00000175302 | 3,30             | 3,5336E-10     | ANKRD30BP1 |                 |                  |                |         |
| ENSG00000234435 | 3,21             | 1,0164E-48     | LINC01432  |                 |                  |                |         |
| ENSG00000136732 | 3,18             | 1,1936E-29     | GYPC       |                 |                  |                |         |
| ENSG00000102924 | 3,18             | 1,6803E-15     | CBLN1      |                 |                  |                |         |
| ENSG00000198695 | 3,12             | 1,401E-162     | MT-ND6     |                 |                  |                |         |
| ENSG00000148513 | 3,12             | 6,4282E-10     | ANKRD30A   |                 |                  |                |         |
| ENSG00000086967 | 3,11             | 1,1194E-19     | MYBPC2     |                 |                  |                |         |
| ENSG00000145850 | 3,11             | 2,022E-15      | TIMD4      |                 |                  |                |         |
| ENSG00000158639 | 3,06             | 1,1574E-26     | PAGE5      |                 |                  |                |         |
| ENSG00000162745 | 3,05             | 1,9565E-13     | OLFML2B    |                 |                  |                |         |
| ENSG00000111913 | 3,00             | 3,7939E-09     | RIPOR2     |                 |                  |                |         |
| ENSG00000152092 | 2,93             | 6,7811E-08     | ASTN1      |                 |                  |                |         |
| ENSG00000152767 | 2,91             | 3,3063E-19     | FARP1      |                 |                  |                |         |
| ENSG00000069188 | 2,88             | 5,0609E-12     | SDK2       |                 |                  |                |         |
| ENSG00000105784 | 2,83             | 3,0825E-08     | RUNDC3B    |                 |                  |                |         |
| ENSG00000133104 | 2,82             | 4,1605E-13     | SPART      |                 |                  |                |         |
| ENSG00000139926 | 2,81             | 3,2008E-08     | FRMD6      |                 |                  |                |         |
| ENSG00000144891 | 2,77             | 4,5906E-07     | AGTR1      |                 |                  |                |         |
| ENSG00000112419 | 2,76             | 1,2766E-07     | PHACTR2    |                 |                  |                |         |
| ENSG00000151150 | 2,75             | 5,6099E-08     | ANK3       |                 |                  |                |         |
| ENSG00000135643 | 2,74             | 6,8385E-13     | KCNMB4     |                 |                  |                |         |
| ENSG00000166025 | 2,67             | 1,9258E-07     | AMOTL1     |                 |                  |                |         |
| ENSG00000090104 | 2,64             | 2,6037E-09     | RGS1       |                 |                  |                |         |
| ENSG00000109971 | 2,59             | 2,8057E-73     | HSPA8      |                 |                  |                |         |
| ENSG00000171617 | 2,55             | 2,9846E-12     | ENC1       |                 |                  |                |         |
| ENSG00000080824 | 2,53             | 8,963E-124     | HSP90AA1   |                 |                  |                |         |
| ENSG00000083857 | 2,53             | 6,2935E-06     | FAT1       |                 |                  |                |         |
| ENSG00000205213 | 2,50             | 8,2371E-06     | LGR4       |                 |                  |                |         |
| ENSG00000182010 | 2,48             | 1,125E-09      | RTKN2      |                 |                  |                |         |
| ENSG00000120694 | 2,42             | 1,3673E-89     | HSPH1      |                 |                  |                |         |
| ENSG00000183454 | 2,41             | 2,8936E-06     | GRIN2A     |                 |                  |                |         |
| ENSG00000119139 | 2,39             | 6,737E-09      | TJP2       |                 |                  |                |         |
| ENSG00000186517 | 2,39             | 2,0446E-30     | ARHGAP30   |                 |                  |                |         |
| ENSG00000204388 | 2,35             | 5,1873E-21     | HSPA1B     |                 |                  |                |         |
| ENSG00000138735 | 2,34             | 2,9992E-19     | PDE5A      |                 |                  |                |         |
| ENSG00000252481 | 2,33             | 3,5371E-07     | SCARNA13   |                 |                  |                |         |
| ENSG00000198797 | 2,33             | 4,1589E-05     | BRINP2     |                 |                  |                |         |
| ENSG00000131711 | 2,32             | 1,1589E-08     | MAP1B      |                 |                  |                |         |
| ENSG00000172478 | 2,32             | 2,3809E-09     | C2orf54    |                 |                  |                |         |
| ENSG00000124191 | 2,31             | 8,6312E-35     | TOX2       |                 |                  |                |         |
| ENSG00000251381 | 2,30             | 4,4373E-07     | LINC00958  |                 |                  |                |         |
| ENSG00000196586 | 2,30             | 9,4349E-78     | MYO6       |                 |                  |                |         |
| ENSG00000160191 | 2,29             | 8,8754E-06     | PDE9A      |                 |                  |                |         |
| ENSG00000105976 | 2,28             | 8,3378E-09     | MET        |                 |                  |                |         |
| ENSG00000168952 | 2,25             | 1,6526E-05     | STXBP6     |                 |                  |                |         |
| ENSG00000275830 | 2,25             | 1,8938E-13     | AL355974.2 |                 |                  |                |         |
| ENSG00000210140 | 2,13             | 7,9093E-13     | MT-TC      |                 |                  |                |         |
| ENSG00000189127 | 2,10             | 0,000269       | ANKRD34B   |                 |                  |                |         |
| ENSG00000042286 | 2,09             | 1,7484E-09     | AIFM2      |                 |                  |                |         |
| ENSG00000148468 | 2,09             | 7,1565E-22     | FAM171A1   |                 |                  |                |         |
| ENSG00000140563 | 2,09             | 1,4769E-05     | MCTP2      |                 |                  |                |         |
| ENSG00000136634 | 2,08             | 0,00020053     | IL10       |                 |                  |                |         |
| ENSG00000163435 | 2,08             | 3,4488E-08     | ELF3       |                 |                  |                |         |
| ENSG00000122188 | 2,07             | 0,00027259     | LAX1       |                 |                  |                |         |
| ENSG00000140859 | 2,04             | 3,3004E-09     | KIFC3      |                 |                  |                |         |
| ENSG00000210194 | 2,04             | 1,9079E-05     | MT-TE      |                 |                  |                |         |
| ENSG00000061676 | 2,03             | 0,00044157     | NCKAP1     |                 |                  |                |         |
| ENSG00000226025 | 2,01             | 1,7007E-10     | AC005515.1 |                 |                  |                |         |
| ENSG00000198133 | 2,01             | 1,2103E-05     | TMEM229B   |                 |                  |                |         |
| ENSG00000100591 | 2,00             | 3,8716E-50     | AHSA1      |                 |                  |                |         |
| ENSG00000156127 | 2,00             | 2,5003E-06     | BATF       |                 |                  |                |         |

**Supplementary Table S3. Down-regulated genes in RPMI8226-R1.0 and L363-R3.5.** In RPMI8226-R1.0 cells we have 183 genes that have been down-regulated > -2 log2-fold (p-value < 0.01) and 43 genes > -2 log2-fold (adjusted p-value < 0.01) have been down-regulated genes in L363-R3.5 in comparison to the respective parental cell line.

| RPMI8226        |                  |                |               | L363            |                  |                |            |
|-----------------|------------------|----------------|---------------|-----------------|------------------|----------------|------------|
| ID              | log2-fold change | p-value (adj.) | Gene          | ID              | log2-fold change | p-value (adj.) | Gene       |
| ENSG00000156738 | -5.14            | 1.91E-37       | MS4A1         | ENSG00000046774 | -3.73            | 5.97E-26       | MAGEC2     |
| ENSG00000137959 | -4.34            | 2.59E-18       | IFI44L        | ENSG00000176406 | -3.45            | 3.20E-19       | RIMS2      |
| ENSG00000132274 | -4.11            | 1.04E-16       | TRIM22        | ENSG00000007237 | -3.21            | 1.75E-16       | GAS7       |
| ENSG00000239998 | -4.09            | 8.15E-17       | LILRA2        | ENSG00000124762 | -3.19            | 3.07E-18       | CDKN1A     |
| ENSG00000172183 | -4.04            | 1.88E-59       | ISG20         | ENSG00000107282 | -3.07            | 1.20E-14       | APBA1      |
| ENSG00000186340 | -4.01            | 4.14E-16       | THBS2         | ENSG00000180964 | -3.05            | 1.20E-14       | TCEAL8     |
| ENSG00000231196 | -3.92            | 1.18E-22       | RP11-495P10.8 | ENSG00000007312 | -3.03            | 1.75E-16       | CD79B      |
| ENSG00000137965 | -3.89            | 8.54E-29       | IFI44         | ENSG00000111885 | -2.96            | 1.50E-19       | MAN1A1     |
| ENSG00000091436 | -3.73            | 8.15E-17       | MAP3K20       | ENSG00000232001 | -2.92            | 3.11E-13       | AC108868.2 |
| ENSG00000132185 | -3.71            | 3.88E-106      | FCRLA         | ENSG00000028277 | -2.78            | 5.40E-17       | POU2F2     |
| ENSG00000172465 | -3.69            | 8.53E-14       | TCEAL1        | ENSG00000035862 | -2.76            | 4.03E-16       | TIMP2      |
| ENSG00000137628 | -3.68            | 3.97E-13       | DDX60         | ENSG00000008283 | -2.69            | 5.96E-11       | CYB561     |
| ENSG00000155961 | -3.63            | 1.80E-23       | RAB39B        | ENSG00000163191 | -2.69            | 9.21E-17       | S100A11    |
| ENSG00000166750 | -3.59            | 1.19E-23       | SLFN5         | ENSG00000154096 | -2.66            | 1.04E-10       | THY1       |
| ENSG00000135925 | -3.57            | 3.11E-15       | WNT10A        | ENSG00000137766 | -2.65            | 6.24E-12       | UNC13C     |
| ENSG00000258732 | -3.33            | 8.18E-12       | AC025884.1    | ENSG00000155657 | -2.63            | 9.13E-16       | TTN        |
| ENSG00000230615 | -3.31            | 3.22E-20       | AL139220.2    | ENSG00000197471 | -2.62            | 1.05E-16       | SPN        |
| ENSG00000139269 | -3.30            | 4.76E-52       | INHBE         | ENSG00000143603 | -2.57            | 4.40E-10       | KCNN3      |
| ENSG00000188282 | -3.26            | 3.59E-10       | RUFY4         | ENSG00000069188 | -2.49            | 2.61E-09       | SDK2       |
| ENSG00000267871 | -3.25            | 1.16E-10       | ZNF460-AS1    | ENSG00000131171 | -2.49            | 2.03E-09       | SH3BGRL    |
| ENSG00000133169 | -3.24            | 2.30E-21       | BEX1          | ENSG00000131378 | -2.39            | 3.65E-09       | RFTN1      |
| ENSG00000183971 | -3.14            | 8.95E-13       | NPW           | ENSG00000143119 | -2.35            | 1.43E-11       | CD53       |
| ENSG00000123329 | -3.13            | 2.74E-13       | ARHGAP9       | ENSG00000272620 | -2.32            | 3.10E-08       | AFAP1-AS1  |
| ENSG00000135046 | -3.11            | 1.19E-27       | ANXA1         | ENSG00000136026 | -2.30            | 1.45E-12       | CKAP4      |
| ENSG00000141447 | -3.11            | 1.45E-11       | OSBPL1A       | ENSG00000162909 | -2.29            | 3.93E-08       | CAPN2      |
| ENSG00000078081 | -3.11            | 3.93E-13       | LAMP3         | ENSG00000179542 | -2.25            | 1.83E-09       | SLITRK4    |
| ENSG00000204287 | -3.08            | 1.42E-47       | HLA-DRA       | ENSG00000145703 | -2.24            | 3.78E-19       | IQGAP2     |
| ENSG00000012223 | -3.07            | 1.04E-16       | LTF           | ENSG00000028137 | -2.23            | 8.08E-08       | TNFRSF1B   |
| ENSG00000132530 | -3.07            | 5.51E-17       | XAF1          | ENSG00000143554 | -2.18            | 1.04E-08       | SLC27A3    |
| ENSG00000233864 | -3.07            | 5.16E-09       | TTY15         | ENSG00000154127 | -2.16            | 2.86E-07       | UBASH3B    |
| ENSG00000183287 | -3.06            | 1.90E-10       | CCBE1         | ENSG00000122986 | -2.14            | 1.20E-08       | HVCN1      |
| ENSG00000198542 | -3.02            | 1.62E-12       | ITGBL1        | ENSG00000006042 | -2.13            | 1.00E-06       | TMTM98     |
| ENSG00000104413 | -3.01            | 1.52E-40       | ESRP1         | ENSG00000197747 | -2.12            | 6.70E-10       | S100A10    |
| ENSG00000182667 | -2.99            | 4.70E-10       | NTM           | ENSG00000170627 | -2.11            | 1.44E-06       | GTSF1      |
| ENSG00000181381 | -2.94            | 2.79E-09       | DDX60L        | ENSG00000184060 | -2.10            | 6.90E-09       | ADAP2      |
| ENSG00000223865 | -2.92            | 1.57E-13       | HLA-DPB1      | ENSG00000184640 | -2.09            | 1.62E-06       | SEPTIN9    |
| ENSG00000198521 | -2.89            | 8.52E-09       | ZNF43         | ENSG00000166681 | -2.08            | 4.25E-09       | BEX3       |
| ENSG00000184304 | -2.89            | 6.48E-10       | PRKD1         | ENSG00000009790 | -2.08            | 1.31E-09       | TRAF3IP3   |
| ENSG00000132846 | -2.88            | 4.72E-21       | ZBED3         | ENSG00000155926 | -2.05            | 1.08E-09       | SLA        |
| ENSG00000196126 | -2.86            | 5.29E-23       | HLA-DRB1      | ENSG00000172578 | -2.05            | 1.13E-06       | KLHL6      |
| ENSG00000142765 | -2.86            | 1.84E-32       | SYTL1         | ENSG00000145685 | -2.04            | 1.25E-06       | LHFPL2     |
| ENSG00000179241 | -2.84            | 1.11E-10       | LDLRAD3       | ENSG00000136167 | -2.02            | 1.72E-11       | LCP1       |
| ENSG00000169855 | -2.84            | 3.34E-09       | ROBO1         | ENSG00000169116 | -2.00            | 2.07E-06       | PARM1      |
| ENSG00000117228 | -2.84            | 1.82E-14       | GBP1          |                 |                  |                |            |
| ENSG00000132141 | -2.82            | 4.64E-13       | CCT6B         |                 |                  |                |            |
| ENSG00000163683 | -2.81            | 9.36E-13       | SMIM14        |                 |                  |                |            |
| ENSG00000187720 | -2.81            | 1.06E-07       | THSD4         |                 |                  |                |            |
| ENSG00000256568 | -2.80            | 3.28E-07       | AP002761.2    |                 |                  |                |            |
| ENSG00000277443 | -2.79            | 4.76E-68       | MARCKS        |                 |                  |                |            |
| ENSG00000110446 | -2.78            | 4.63E-14       | SLC15A3       |                 |                  |                |            |

|                  |       |            |            |
|------------------|-------|------------|------------|
| ENSG00000103056  | -2,77 | 5,59E-10   | SMPD3      |
| ENSG00000227591  | -2,75 | 8,95E-21   | AL031316.1 |
| ENSG00000169213  | -2,72 | 5,20E-09   | RAB3B      |
| ENSG00000100968  | -2,72 | 4,15E-10   | NFATC4     |
| ENSG00000157601  | -2,71 | 1,94E-09   | MX1        |
| ENSG00000196664  | -2,70 | 1,17E-11   | TLR7       |
| ENSG00000167800  | -2,69 | 4,58E-07   | TBX10      |
| ENSG00000196735  | -2,69 | 4,53E-07   | HLA-DQA1   |
| ENSG00000239039  | -2,68 | 1,24E-14   | SNORD13    |
| ENSG00000128165  | -2,66 | 1,34E-67   | ADM2       |
| ENSG00000183690  | -2,66 | 1,48E-06   | EFHC2      |
| ENSG00000164627  | -2,66 | 6,95E-07   | KIF6       |
| ENSG00000138755  | -2,65 | 7,25E-07   | CXCL9      |
| ENSG00000116701  | -2,64 | 2,06E-34   | NCF2       |
| ENSG00000115956  | -2,64 | 4,34E-78   | PLEK       |
| ENSG00000116761  | -2,64 | 4,24E-17   | CTH        |
| ENSG00000185507  | -2,63 | 7,21E-19   | IRF7       |
| ENSG00000115414  | -2,59 | 5,22E-72   | FN1        |
| ENSG00000157514  | -2,57 | 1,75E-48   | TSC22D3    |
| ENSG00000163285  | -2,56 | 4,79E-07   | GABRG1     |
| ENSG00000104972  | -2,56 | 1,53E-07   | LILRB1     |
| ENSG00000174600  | -2,55 | 2,88E-06   | CMKLR1     |
| ENSG00000167995  | -2,53 | 6,13E-06   | BEST1      |
| ENSG00000164742  | -2,52 | 3,18E-34   | ADCY1      |
| ENSG00000204936  | -2,52 | 3,78E-14   | CD177      |
| ENSG00000114374  | -2,52 | 2,91E-06   | USP9Y      |
| ENSG00000168016  | -2,52 | 2,37E-14   | TRANK1     |
| ENSG00000163219  | -2,50 | 1,44E-06   | ARHGAP25   |
| ENSG00000248498  | -2,49 | 5,07E-06   | ASNSP1     |
| ENSG00000112799  | -2,49 | 1,22E-32   | LY86       |
| ENSG00000122420  | -2,48 | 7,78E-06   | PTGFR      |
| ENSG00000183486  | -2,48 | 4,54E-06   | MX2        |
| ENSG00000137745  | -2,46 | 1,22E-23   | MMP13      |
| ENSG00000126709  | -2,46 | 6,54E-08   | IFI6       |
| ENSG00000231389  | -2,46 | 3,71E-13   | HLA-DPA1   |
| ENSG00000138646  | -2,45 | 1,71E-08   | HERC5      |
| ENSG00000229391  | -2,45 | 2,65E-06   | HLA-DRB6   |
| ENSG00000102524  | -2,45 | 1,70E-08   | TNFSF13B   |
| ENSG000000014257 | -2,43 | 8,37E-19   | ACPP       |
| ENSG00000174080  | -2,43 | 8,95E-07   | CTSF       |
| ENSG00000169896  | -2,43 | 1,91E-06   | ITGAM      |
| ENSG00000170017  | -2,43 | 2,50E-09   | ALCAM      |
| ENSG00000116117  | -2,42 | 9,97E-07   | PARD3B     |
| ENSG00000175197  | -2,42 | 5,25E-24   | DDIT3      |
| ENSG00000198692  | -2,41 | 6,28E-21   | EIF1AY     |
| ENSG00000177337  | -2,39 | 2,44E-09   | DLGAP1-AS1 |
| ENSG00000234936  | -2,37 | 2,43E-08   | AC010883.1 |
| ENSG00000170909  | -2,36 | 1,03E-05   | OSCAR      |
| ENSG00000172361  | -2,35 | 7,08E-08   | CFAP53     |
| ENSG00000187608  | -2,35 | 2,71E-06   | ISG15      |
| ENSG00000168961  | -2,35 | 6,83E-08   | LGALS9     |
| ENSG00000130766  | -2,34 | 5,89E-79   | SESN2      |
| ENSG00000151012  | -2,33 | 3,04E-47   | SLC7A11    |
| ENSG00000265778  | -2,33 | 1,61E-07   | AC018413.1 |
| ENSG00000168081  | -2,33 | 7,11E-10   | PNOC       |
| ENSG00000263004  | -2,32 | 1,10E-11   | AC007114.1 |
| ENSG000000019582 | -2,32 | 7,08E-77   | CD74       |
| ENSG00000103546  | -2,32 | 4,45E-05   | SLC6A2     |
| ENSG00000100889  | -2,32 | 2,50E-32   | PCK2       |
| ENSG00000182568  | -2,32 | 4,56E-10   | SATB1      |
| ENSG00000135218  | -2,31 | 5,21E-06   | CD36       |
| ENSG00000235770  | -2,31 | 1,63E-05   | LINC00607  |
| ENSG00000138835  | -2,31 | 3,22E-07   | RG53       |
| ENSG00000186832  | -2,30 | 4,59E-05   | KRT16      |
| ENSG00000141682  | -2,30 | 1,95E-38   | PMAIP1     |
| ENSG00000101188  | -2,30 | 3,60E-05   | NTSR1      |
| ENSG00000162407  | -2,29 | 3,77E-06   | PLPP3      |
| ENSG00000196517  | -2,29 | 2,43E-26   | SLC6A9     |
| ENSG00000152926  | -2,28 | 9,15E-06   | ZNF117     |
| ENSG00000185745  | -2,28 | 1,22E-05   | IFIT1      |
| ENSG00000163220  | -2,26 | 2,44E-18   | S100A9     |
| ENSG00000164647  | -2,26 | 1,47E-07   | STEAP1     |
| ENSG00000167103  | -2,25 | 4,50E-31   | PIP5KL1    |
| ENSG00000159239  | -2,25 | 3,07E-12   | AC005041.1 |
| ENSG00000253276  | -2,24 | 7,47E-13   | CCDC71L    |
| ENSG00000171791  | -2,23 | 2,51E-47   | BCL2       |
| ENSG00000276231  | -2,23 | 8,58E-05   | PIK3R6     |
| ENSG00000263412  | -2,23 | 1,02E-06   | AC004477.1 |
| ENSG00000170345  | -2,22 | 9,69E-05   | FOS        |
| ENSG00000129990  | -2,22 | 1,09E-10   | SYT5       |
| ENSG00000087074  | -2,21 | 2,87E-18   | PPP1R15A   |
| ENSG00000119917  | -2,21 | 1,20E-07   | IFIT3      |
| ENSG00000131002  | -2,21 | 2,02E-10   | TXLNGV     |
| ENSG00000074621  | -2,20 | 5,79E-06   | SLC24A1    |
| ENSG00000163347  | -2,19 | 4,75E-05   | CLDN1      |
| ENSG00000166927  | -2,18 | 0,00010585 | MS4A7      |
| ENSG00000184939  | -2,17 | 7,34E-12   | ZFP90      |

|                 |       |            |            |
|-----------------|-------|------------|------------|
| ENSG00000164440 | -2,15 | 6,41E-06   | TXLNB      |
| ENSG00000198496 | -2,15 | 5,73E-09   | NBR2       |
| ENSG00000261652 | -2,15 | 8,61E-10   | C15orf65   |
| ENSG00000263711 | -2,15 | 7,92E-13   | AC079062.1 |
| ENSG00000226751 | -2,15 | 5,13E-05   | AF127936.1 |
| ENSG00000144366 | -2,14 | 2,29E-17   | GULP1      |
| ENSG00000233230 | -2,14 | 6,65E-05   | AC079807.1 |
| ENSG00000170006 | -2,12 | 8,41E-07   | TMEM154    |
| ENSG00000273906 | -2,12 | 0,00022433 | AC011297.1 |
| ENSG00000184545 | -2,12 | 3,24E-06   | DUSP8      |
| ENSG00000010219 | -2,12 | 5,75E-07   | DYRK4      |
| ENSG00000182749 | -2,10 | 0,00021277 | PAQR7      |
| ENSG00000129824 | -2,09 | 5,60E-30   | RPS4Y1     |
| ENSG00000138642 | -2,08 | 6,20E-05   | HERC6      |
| ENSG00000086730 | -2,08 | 2,13E-14   | LAT2       |
| ENSG00000148175 | -2,08 | 3,22E-51   | STOM       |
| ENSG00000105048 | -2,08 | 3,93E-12   | TNNT1      |
| ENSG00000213462 | -2,08 | 3,13E-08   | ERV3-1     |
| ENSG00000196668 | -2,08 | 2,56E-18   | LINC00173  |
| ENSG00000133808 | -2,07 | 2,46E-05   | MICALC     |
| ENSG00000155980 | -2,07 | 0,00034075 | KIF5A      |
| ENSG00000172159 | -2,06 | 2,66E-25   | FRMD3      |
| ENSG00000235961 | -2,06 | 0,00021528 | PNMA6A     |
| ENSG00000115415 | -2,05 | 1,03E-08   | STAT1      |
| ENSG00000092607 | -2,05 | 0,00039139 | TBX15      |
| ENSG00000172264 | -2,05 | 1,01E-10   | MACROD2    |
| ENSG00000144481 | -2,05 | 1,82E-08   | TRPM8      |
| ENSG00000111058 | -2,04 | 0,00029605 | ACSS3      |
| ENSG00000071991 | -2,04 | 0,00032681 | CDH19      |
| ENSG00000244485 | -2,04 | 7,14E-06   | RPL18P13   |
| ENSG00000188177 | -2,04 | 3,01E-18   | ZC3H6      |
| ENSG00000181722 | -2,04 | 3,89E-05   | ZBTB20     |
| ENSG00000149781 | -2,03 | 5,22E-07   | FERMT3     |
| ENSG00000111335 | -2,03 | 3,52E-08   | OAS2       |
| ENSG00000178662 | -2,03 | 0,00041594 | CSRNP3     |
| ENSG00000206052 | -2,02 | 1,33E-14   | DOK6       |
| ENSG00000164088 | -2,02 | 6,15E-23   | PPM1M      |
| ENSG00000151632 | -2,02 | 0,00049697 | AKR1C2     |
| ENSG00000111331 | -2,01 | 7,38E-06   | OAS3       |
| ENSG00000233912 | -2,01 | 9,82E-06   | AC026202.2 |
| ENSG00000151470 | -2,00 | 6,13E-07   | C4orf33    |
| ENSG00000135116 | -2,00 | 1,68E-06   | HRK        |
| ENSG00000198816 | -2,00 | 0,00026937 | ZNF358     |
| ENSG00000108771 | -2,00 | 5,72E-05   | DHX58      |
| ENSG00000185615 | -2,00 | 2,57E-24   | PDIA2      |
| ENSG00000163218 | -2,00 | 0,00055157 | PGLYRP4    |
