# Supplementary material for: Mitochondrial Kv1.3 Channels as Target for Treatment of Multiple Myeloma
Source: MDPI journal article supplement (doi:10.3390/cancers14081955), 2022-04-13
Supplement: s1 [file s1]

Blot from Figure 1 a

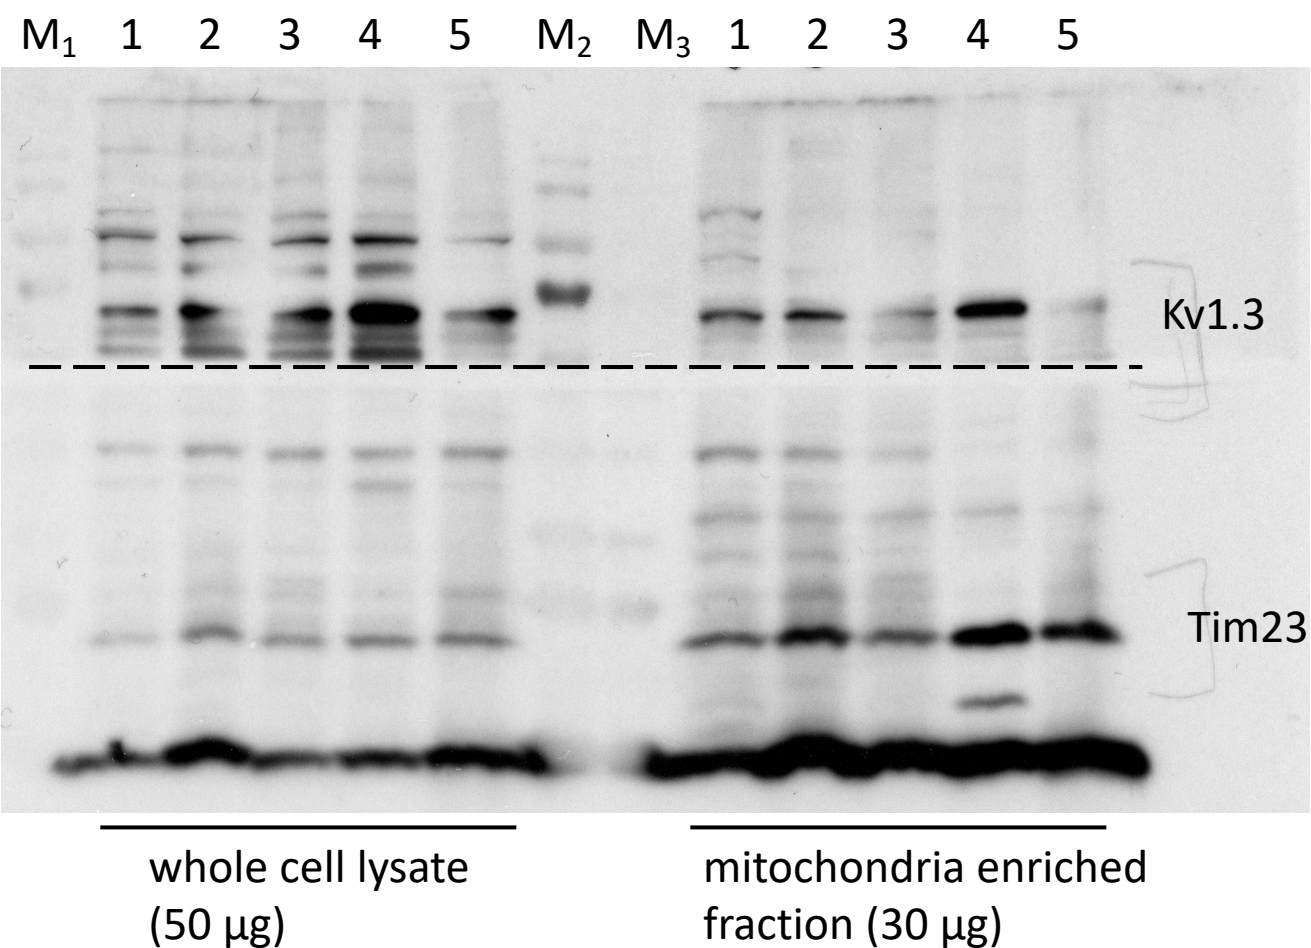

M<sub>1,3</sub> = Marker (2.5 µl)  
1 = U266  
2 = L-363  
3 = RPMI-8226  
4 = Jurkat  
5 = MOPC  
M<sub>2</sub> = Marker (5 µl)

Gel: 8.5%

Marker = Thermo Scientific PageRuler Prestained Protein Ladder  
#26616
